# Supplementary material for: Work-related exposure to violence or threats and risk of mental disorders and symptoms: a systematic review and meta-analysis
Source: PubMed Central journal article supplement (PMC8506313; doi:10.5271/sjweh.3877), 2020-07-01
Supplement: SJWEH-46-339-S001.pdf [file SJWEH-46-339-S001.pdf]

# Work-related exposure to violence or threats and risk of mental disorders and symptoms: a systematic review and meta-analysis <sup>1</sup>

by Laura A Rudkjoebing, MD,<sup>2</sup> Ane Berger Bungum, BSc, Esben Meulengracht Flachs, PhD, Nanna Hurwitz Eller, DMSc, Marianne Borritz, MD, PhD, Birgit Aust, MSc, PhD, Reiner Rugulies, MPH, PhD, Naja Hulvej Rod, MS, PhD, Karin Biering, PhD, Jens Peter Bonde, MD, PhD

1. Supplementary material
2. Correspondence to: Laura Aviaja Rudkjoebing, Department of Occupational and Environmental Medicine, Bispebjerg University Hospital, Bispebjerg Bakke 23, DK-2400 Copenhagen NV, Denmark. [E-mail: Laura.aviaja.rudkjoebing.01@regionh.dk]

## Appendix A. PRISMA 2009 checklist

| Section/topic                      | #  | Checklist item                                                                                                                                                                                                                                                                                              | Reported on page #  |
|------------------------------------|----|-------------------------------------------------------------------------------------------------------------------------------------------------------------------------------------------------------------------------------------------------------------------------------------------------------------|---------------------|
| <b>TITLE</b>                       |    |                                                                                                                                                                                                                                                                                                             |                     |
| Title                              | 1  | Identify the report as a systematic review, meta-analysis, or both.                                                                                                                                                                                                                                         | 1                   |
| <b>ABSTRACT</b>                    |    |                                                                                                                                                                                                                                                                                                             |                     |
| Structured summary                 | 2  | Provide a structured summary including, as applicable: background; objectives; data sources; study eligibility criteria, participants, and interventions; study appraisal and synthesis methods; results; limitations; conclusions and implications of key findings; systematic review registration number. | 3                   |
| <b>INTRODUCTION</b>                |    |                                                                                                                                                                                                                                                                                                             |                     |
| Rationale                          | 3  | Describe the rationale for the review in the context of what is already known.                                                                                                                                                                                                                              | 4                   |
| Objectives                         | 4  | Provide an explicit statement of questions being addressed with reference to participants, interventions, comparisons, outcomes, and study design (PICOS).                                                                                                                                                  | 4                   |
| <b>METHODS</b>                     |    |                                                                                                                                                                                                                                                                                                             |                     |
| Protocol and registration          | 5  | Indicate if a review protocol exists, if and where it can be accessed (e.g., Web address), and, if available, provide registration information including registration number.                                                                                                                               | 5                   |
| Eligibility criteria               | 6  | Specify study characteristics (e.g., PICOS, length of follow-up) and report characteristics (e.g., years considered, language, publication status) used as criteria for eligibility, giving rationale.                                                                                                      | 5-6                 |
| Information sources                | 7  | Describe all information sources (e.g., databases with dates of coverage, contact with study authors to identify additional studies) in the search and date last searched.                                                                                                                                  | 5                   |
| Search                             | 8  | Present full electronic search strategy for at least one database, including any limits used, such that it could be repeated.                                                                                                                                                                               | Appendix B          |
| Study selection                    | 9  | State the process for selecting studies (i.e., screening, eligibility, included in systematic review, and, if applicable, included in the meta-analysis).                                                                                                                                                   | 6                   |
| Data collection process            | 10 | Describe method of data extraction from reports (e.g., piloted forms, independently, in duplicate) and any processes for obtaining and confirming data from investigators.                                                                                                                                  | 6                   |
| Data items                         | 11 | List and define all variables for which data were sought (e.g., PICOS, funding sources) and any assumptions and simplifications made.                                                                                                                                                                       | 6, Appendix C       |
| Risk of bias in individual studies | 12 | Describe methods used for assessing risk of bias of individual studies (including specification of whether this was done at the study or outcome level), and how this information is to be used in any data synthesis.                                                                                      | 7                   |
| Summary measures                   | 13 | State the principal summary measures (e.g., risk ratio, difference in means).                                                                                                                                                                                                                               | 6                   |
| Synthesis of results               | 14 | Describe the methods of handling data and combining results of studies, if done, including measures of consistency (e.g., $I^2$ ) for each meta-analysis.                                                                                                                                                   | 8                   |
| Risk of bias across studies        | 15 | Specify any assessment of risk of bias that may affect the cumulative evidence (e.g., publication bias, selective reporting within studies).                                                                                                                                                                | 8                   |
| Additional analyses                | 16 | Describe methods of additional analyses (e.g., sensitivity or subgroup analyses, meta-regression), if done, indicating which were pre-specified.                                                                                                                                                            | 8                   |
| <b>RESULTS</b>                     |    |                                                                                                                                                                                                                                                                                                             |                     |
| Study selection                    | 17 | Give numbers of studies screened, assessed for eligibility, and included in the review, with reasons for exclusions at each stage, ideally with a flow diagram.                                                                                                                                             | Figure 1            |
| Study characteristics              | 18 | For each study, present characteristics for which data were extracted (e.g., study size, PICOS, follow-up period) and provide the citations.                                                                                                                                                                | Appendix C          |
| Risk of bias within studies        | 19 | Present data on risk of bias of each study and, if available, any outcome level assessment (see item 12).                                                                                                                                                                                                   | Appendix C, Table 7 |
| Results of individual studies      | 20 | For all outcomes considered (benefits or harms), present, for each study: (a) simple summary data for each intervention group (b) effect estimates and confidence intervals, ideally with a forest plot.                                                                                                    | Fig. 2-3            |
| Synthesis of results               | 21 | Present results of each meta-analysis done, including confidence intervals and measures of consistency.                                                                                                                                                                                                     | Fig. 2-3, 9-12      |
| Risk of bias across studies        | 22 | Present results of any assessment of risk of bias across studies (see Item 15).                                                                                                                                                                                                                             | 9-12                |
| Additional analysis                | 23 | Give results of additional analyses, if done (e.g., sensitivity or subgroup analyses, meta-regression [see Item 16]).                                                                                                                                                                                       | 11-12               |
| <b>DISCUSSION</b>                  |    |                                                                                                                                                                                                                                                                                                             |                     |
| Summary of evidence                | 24 | Summarize the main findings including the strength of evidence for each main outcome; consider their relevance to key groups (e.g., healthcare providers, users, and policy makers).                                                                                                                        | 12-14               |
| Limitations                        | 25 | Discuss limitations at study and outcome level (e.g., risk of bias), and at review-level (e.g., incomplete retrieval of identified research, reporting bias).                                                                                                                                               | 13-14               |
| Conclusions                        | 26 | Provide a general interpretation of the results in the context of other evidence, and implications for future research.                                                                                                                                                                                     | 14                  |
| <b>FUNDING</b>                     |    |                                                                                                                                                                                                                                                                                                             |                     |
| Funding                            | 27 | Describe sources of funding for the systematic review and other support (e.g., supply of data); role of funders for the systematic review.                                                                                                                                                                  | 15                  |

## Appendix B. Systematic literature search specification

### Work-related exposure to violence or threats of violence and risk of mental disorders: a systematic review and meta-analysis.

(alternative exposures MeSH/TIAB AND alternative outcomes (MeSH/TIAB) AND alternative designs (TIAB)

(inclusion criteria: original peer reviewed full text papers in English and human studies)

| Exposure                                                                                                                                                                                                                                                                                                                                                                              | Outcome                                                                                                                                                                                                      | Design                                                                                                                                             |
|---------------------------------------------------------------------------------------------------------------------------------------------------------------------------------------------------------------------------------------------------------------------------------------------------------------------------------------------------------------------------------------|--------------------------------------------------------------------------------------------------------------------------------------------------------------------------------------------------------------|----------------------------------------------------------------------------------------------------------------------------------------------------|
| workplace violence (MesH),<br>threats,<br>assault,<br>aggression,<br>battery,<br>pushing, hitting with an object, hitting<br>with a body part, slapping, kicking,<br>punching, pinching, scratching, biting,<br>pulling hair, throwing an object,<br>spitting, beating, shooting, stabbing,<br>squeezing, twisting, rape<br>shaking fists, throwing furniture,<br>destroying property | mental disorder<br>(MeSH),<br>depression,<br>depressive<br>symptoms,<br>anxiety,<br>adjustment disorder<br>psychological<br>distress,<br>burnout,<br>sleep,<br>psychotropic drugs,<br>sedativa,<br>hypnotics | cross-sectional,<br>case-control,<br>case-referent,<br>cohort,<br>follow-up,<br>longitudinal,<br>prospective<br>health effects,<br>health outcomes |

A PubMed search 16.4.2018 using these search strings results in 2,077 hits.

In the screening process, studies can be excluded in terms of the following reasons: missing relevant exposure, missing relevant outcome, missing a risk estimate or other reasons (which will be specified for each excluded study).

## APPENDIX C. Summary of results, Table 1-7

Table 1. Characteristics of studies addressing depressive symptoms. Shaded are cohort studies

| Author Country                    | Population                                                                        | Follow-up  | Exposure ascertainment                                                                                           | Outcome             | Outcome ascertainment                                           | Outcome prevalence in the reference group                      | Comparison                                                                                                                   | RR               | 95% CI                     | Completeness of reporting 0-8 | Bias score 0-5 |
|-----------------------------------|-----------------------------------------------------------------------------------|------------|------------------------------------------------------------------------------------------------------------------|---------------------|-----------------------------------------------------------------|----------------------------------------------------------------|------------------------------------------------------------------------------------------------------------------------------|------------------|----------------------------|-------------------------------|----------------|
| Ryan et al. 2008, USA (34)        | Employees at a pediatric state psychiatric hospital<br>N=93                       | -          | Self-administered questionnaire, The Experience of Assault Questionnaire, 23 items                               | Depressive symptoms | The Beck Depression Inventory-II (BDI-II), 21 items             | n.a.                                                           | Assaulted (A) vs non-assaulted (NA)                                                                                          | 3.47             | 1.58-7.62                  | 4                             | 3              |
| Cavanaugh et al 2014, USA (37)    | Female nurses and nursing personnel<br>N=1044<br>Response rate 81%                | Six months | Self-administered questionnaire, one question                                                                    | Depressive symptoms | The Center for Epidemiologic Studies depression scale (CESD-10) | 20.0 %                                                         | Threats or physical workplace violence at baseline yes/no                                                                    | 1.35             | 0.10-17.52                 | 5                             | 3              |
| Gong et al. 2014, China (50)      | Physicians working in public hospitals<br>N=2641<br>Response rate 96.46%          | -          | Self-administered questionnaire, one question                                                                    | Depressive symptoms | The Zung Self-Rating Depression Scale (SDS)                     | 28.1 %                                                         | Frequency of conflict and violence - often compared to none (ref)                                                            | 3.95             | 2.69-5.82                  | 7                             | 2              |
| Da Silva et al. 2015, Brazil (46) | Physicians, nurses, nursing assistants and community health workers<br><br>N=2940 | -          | Face-to-face interview, the questionnaire of the WHO multi-country study on women's health and domestic violence | Depressive symptoms | Patient Health Questionnaire, Nine items (PHQ-9)                | Depressive symptoms 36.3%<br><br>Probable major depression 16% | Threats vs no threats<br>One/few times<br>Several times<br><br>Physical aggression vs none<br>One/few times<br>Several times | 1.28<br><br>1.48 | 0.95-1.74<br><br>0.83-2.66 | 8                             | 1              |

|                                         |                                                                                                        |   |                                                                         |                     |                                                                 |        |                                                                                                                                           |                  |                           |   |   |
|-----------------------------------------|--------------------------------------------------------------------------------------------------------|---|-------------------------------------------------------------------------|---------------------|-----------------------------------------------------------------|--------|-------------------------------------------------------------------------------------------------------------------------------------------|------------------|---------------------------|---|---|
|                                         | Response rate 93%                                                                                      |   |                                                                         |                     |                                                                 |        |                                                                                                                                           | 1.67<br>3.68     | 0.91-3.04<br>0.85-15.79   |   |   |
| Jung et al. 2015, Korea (49)            | Substitute drivers, N=161                                                                              | - | Self-administered questionnaire, two questions                          | Depressive symptoms | The Center for Epidemiologic Studies depression scale (CESD-10) | 16.8 % | Verbal violence >4 times a year vs <4 times a year (or none)<br><br>Experienced vs Never experienced physical violence over the past year | 2.84<br><br>3.26 | 1.11-.30<br><br>1.27-8.36 | 6 | 2 |
| Butterworth et al. 2016, Australia (51) | Randomly selected residents of Canberra and Queanbeyan (NSW) aged 52-58 years N=1466 Response rate 80% | - | Face-to-face interview and online questionnaire, three single questions | Depressive symptoms | Patient Health Questionnaire Depression Scale (PHQ)             | 14.6 % | Threats of violence vs no threats of violence                                                                                             | 1.62             | 0.92, 3.19                | 8 | 2 |
| Fang et al. 2018, China (45)            | Otorhinolaryngologists and nurses N=652 Response rate 83.6 %                                           | - | Self-administered questionnaire, modified version of WHO 2003           | Depressive symptoms | Zung self-rating depression scale (SDS)                         | 57.2 % | Physical violence yes/no                                                                                                                  | 1.82             | 1.06-3.12                 | 7 | 2 |
| Maran et al. 2018, Italy (33)           | Hospital staff in cardiology and oncology N=99                                                         | - | Self-administered questionnaire, Violent Incident Form (VIF)            | Depressive symptoms | Beck Depression Inventory (BDI)                                 | n.a.   | Depression suffering yes/no                                                                                                               | 1.52             | 0.73-3.18                 | 5 | 3 |

Table 2. Characteristics of the study addressing the prescription of anxiolytic medicine. Shaded rows are cohort studies.

| Author<br>Country                | Population                                                                                 | Follow-up             | Exposure<br>ascertainment                                     | Outcome     | Outcome<br>ascertainment                  | Outcome<br>prevalence in<br>the reference<br>group | Comparison            | RR   | 95% CI    | Completeness<br>of reporting<br>0-8 | Bias<br>score<br>0-5 |
|----------------------------------|--------------------------------------------------------------------------------------------|-----------------------|---------------------------------------------------------------|-------------|-------------------------------------------|----------------------------------------------------|-----------------------|------|-----------|-------------------------------------|----------------------|
| Madsen et al. 2011, Denmark (47) | Random sample of the working-age population in Denmark<br>N=15,246<br>Response rate 60-80% | Three and a half year | Self-administered questionnaire and interviews, two questions | Anxiolytics | Register of Medicinal Products Statistics | 2.7 %                                              | Violence<br>yes vs no | 1.05 | 0.76-1.45 | 8                                   | 1                    |

Table 3. Characteristics of studies addressing anxiety symptoms. Shaded are cohort studies.

| Author<br>Country            | Population                                                               | Follow-up | Exposure<br>ascertainment                     | Outcome          | Outcome<br>ascertainment                 | Outcome<br>prevalence in<br>the reference<br>group | Comparison                                                        | RR   | 95% CI     | Completeness<br>of reporting<br>0-8 | Bias<br>score<br>0-5 |
|------------------------------|--------------------------------------------------------------------------|-----------|-----------------------------------------------|------------------|------------------------------------------|----------------------------------------------------|-------------------------------------------------------------------|------|------------|-------------------------------------|----------------------|
| Gong et al. 2014, China (50) | Physicians working in public hospitals<br>N=2641<br>Response rate 96.46% | -         | Self-administered questionnaire, one question | Anxiety symptoms | The Zung Self-rating Anxiety Scale (SAS) | 25.7 %                                             | Frequency of conflict and violence - often compared to none (ref) | 6.72 | 4.38-10.30 | 7                                   | 2                    |

|                                         |                                                                                                              |   |                                                                  |                  |                                                                                      |        |                                               |      |            |   |   |
|-----------------------------------------|--------------------------------------------------------------------------------------------------------------|---|------------------------------------------------------------------|------------------|--------------------------------------------------------------------------------------|--------|-----------------------------------------------|------|------------|---|---|
| Butterworth et al. 2016, Australia (51) | Randomly selected residents of Canberra and Queanbeyan (NSW) aged 52-58 years<br>N=1466<br>Response rate 80% | - | Face-to-face interview and online questionnaire, three questions | Anxiety symptoms | Face-to-face interview and online questionnaire, Goldberg Anxiety Scale (nine items) | 13.2 % | Threats of violence vs no threats of violence | 1.87 | 0.94- 3.69 | 8 | 2 |
| Maran et al. 2018, Italy (33)           | Hospital staff in cardiology and oncology<br>N=99                                                            | - | Self-administered questionnaire, Violent Incident Form (VIF)     | Anxiety symptoms | State-Trait Anxiety Inventory (STAI Y)                                               | n.a.   | State anxiety, suffering yes/no               | 1.00 | 0.48-2.09  | 5 | 3 |

Table 4. Characteristics of cross-sectional studies addressing psychological distress.

| Author Country                  | Population                                                              | Follow-up | Exposure ascertainment                                                                                      | Outcome                | Outcome ascertainment                | Outcome prevalence in the reference group | Comparison                                                                                            | RR                               | (95% CI)                                             | Completeness of reporting 0-8 | Bias score 0-5 |
|---------------------------------|-------------------------------------------------------------------------|-----------|-------------------------------------------------------------------------------------------------------------|------------------------|--------------------------------------|-------------------------------------------|-------------------------------------------------------------------------------------------------------|----------------------------------|------------------------------------------------------|-------------------------------|----------------|
| Leino et al. 2011, Finland (40) | Police officers and security guards<br>N=1993<br><br>Response rate 58 % | -         | Self-administered questionnaire, one question and a list of 13 items of differed forms of physical violence | Psychological distress | General Health questionnaire (GHQ12) | 17%                                       | Physically violent acts none vs Seldom<br>Often<br>very often<br><br>Threats or None vs at least once | 1.30<br>1.23<br>1.32<br><br>1.41 | 0.88-1.92<br>0.82-1.82<br>0.87-2.00<br><br>1.04-1.90 | 7                             | 2              |

|                                           |                                                                             |   |                                                                  |                                       |                                       |       |                                       |              |                        |   |   |
|-------------------------------------------|-----------------------------------------------------------------------------|---|------------------------------------------------------------------|---------------------------------------|---------------------------------------|-------|---------------------------------------|--------------|------------------------|---|---|
| Magnavita and Heponiemi. 2012, Italy (42) | Health care workers<br>N=1455<br>Response rate 80,1%                        | - | Self-administered questionnaire, the Violent Incident Form (VIF) | Psychological 'problems'              | General Health questionnaire (GHQ 12) | n.a.  | Physical violence vs none             | 1.00         | 0.94-1.08              | 5 | 3 |
| Jaradat et al. 2016, Palestine (35)       | Nurses<br>N=343<br>Response rate 92.2%                                      | - | Self-administered questionnaire, WHO 2003                        | Psychological distress                | General Health Questionnaire GHQ 30   | n.a.  | Exposed vs unexposed Violence Threats | 2.45<br>1.72 | 0.98-6.13<br>1.08-2.76 | 7 | 2 |
| Zafar et al. 2016, Pakistan (44)          | Physicians working in four large hospitals<br>N=179<br>Response rate 92.2 % | - | Self-administered questionnaire, WHO 2003                        | Mental distress (anxiety, depression) | General Health Questionnaire (GHQ12)  | 39.3% | Physical attack vs no attacks         | 0.84         | 0.3-2.4                | 7 | 2 |

Table 5. Characteristics of studies addressing burnout, emotional exhaustion and fatigue. Shaded rows are cohort studies

| Author Country                                     | Population                                                                 | Follow-up  | Exposure ascertainment                        | Outcome | Outcome ascertainment                                    | Outcome prevalence in the reference group | Comparison                                                                | RR                   | 95% CI                              | Completeness of reporting 0-8 | Bias score 0-5 |
|----------------------------------------------------|----------------------------------------------------------------------------|------------|-----------------------------------------------|---------|----------------------------------------------------------|-------------------------------------------|---------------------------------------------------------------------------|----------------------|-------------------------------------|-------------------------------|----------------|
| Hogh et al. 2003, Denmark (57)                     | Random sample of Danish citizens/employees<br>N=4961<br>Response rate 90 % | Five years | Telephone interview, one question             | Fatigue | Telephone interview, SF-36 questionnaire, four questions | 9.4%                                      | Exposure to violence no or only slightly vs Not much Moderately Very much | 1.13<br>1.75<br>2.95 | 0.73-1.74<br>1.03-2.97<br>1.27-6.88 | 8                             | 2              |
| Estryn-Behar et al. 2008, Eight European countries | Nurses<br>N=39.898 (NEXT study)<br>Response rate 51 %                      | One year   | Self-administered questionnaire, one question | Burnout | The Copenhagen Burnout Inventory, six items              | n.a.                                      | Violence seldom vs Monthly Weekly+                                        | 1.38<br>1.90         | 1.26-1.52<br>1.72-2.11              | 5                             | 3              |

|                                         |                                                                                             |          |                                                                                                                                |                      |                                                             |                           |                                                                               |              |                        |   |   |
|-----------------------------------------|---------------------------------------------------------------------------------------------|----------|--------------------------------------------------------------------------------------------------------------------------------|----------------------|-------------------------------------------------------------|---------------------------|-------------------------------------------------------------------------------|--------------|------------------------|---|---|
| (54)                                    |                                                                                             |          |                                                                                                                                |                      |                                                             |                           |                                                                               |              |                        |   |   |
| Couto and Lawoko. 2011, Mozambique (43) | Drivers and conductors working with road passenger transport<br>N=504<br>Response rate 100% | -        | Telephone interviews, the Violent Incident Form (VIF)                                                                          | Burnout              | Maslach Burnout Inventory, General Survey                   | Mild 30.1%<br>Severe 3.6% | Workplace violence no vs Yes, once or twice<br>Yes several times              | 0.96<br>1.88 | 0.57-1.63<br>1.06-3.32 | 8 | 1 |
| Zafar et al. 2016, Pakistan (44)        | Physicians working in four large hospitals<br>N=179<br><br>Response rate 92.2 %             | -        | Self-administered questionnaire, WHO 2003                                                                                      | Emotional exhaustion | Maslach Burnout Inventory, Emotional exhaustion, nine items | 42.4%                     | Physical attack vs no attacks                                                 | 1.47         | 0.6-3.6                | 7 | 2 |
| Andersen et al. 2017, Denmark (41)      | Prison personnel<br>N=1741,<br><br>Response rate 61%                                        | One year | Self-administered questionnaire, one question and a checklist of 11 violent incidents and seven different threats of violence. | Burnout              | Copenhagen Psychosocial Questionnaire                       | n.a.                      | Most exposed quartile vs least exposed three quartiles<br>Violence<br>Threats | 0.93<br>1.21 | 0.61-1.43<br>0.84-1.73 | 7 | 4 |
| Hamdan and Hamra. 2017, Palestine (53)  | Workers in emergency departments<br>N=444<br>Response rate 74.5 %                           | -        | Self-administered questionnaire, one question                                                                                  | Burnout              | Maslach Burnout Inventory, Human Services Survey            | 64.8%                     | Workplace violence yes vs no<br>Violence<br>Threats                           | 2.02<br>1.79 | 1.12-3.63<br>0.87-3.70 | 6 | 2 |



Table 6. Characteristics of studies addressing disturbed sleep. Shaded are cohort studies

| Author<br>Country                    | Population                                                                 | Follow-up    | Exposure<br>ascertainment                     | Outcome          | Outcome<br>ascertainment                   | Outcome<br>prevalence<br>in the<br>reference<br>group | Comparison                                                                                    | RR                           | 95% CI                                           | Completeness<br>of reporting<br>0-8 | Bias<br>score<br>0-5 |
|--------------------------------------|----------------------------------------------------------------------------|--------------|-----------------------------------------------|------------------|--------------------------------------------|-------------------------------------------------------|-----------------------------------------------------------------------------------------------|------------------------------|--------------------------------------------------|-------------------------------------|----------------------|
| Eriksen et al. 2008, Norway (36)     | Random sample of nurses aids<br>N=4774<br>Response rate 62 %               | Three months | Self-administered questionnaire, one question | Poor sleep       | Basic Nordic Sleep questionnaire, one item | 29.7 %                                                | Never or very seldom vs<br>Rather seldom<br>Sometimes<br>Rather often<br>Very often or always | 0.87<br>1.08<br>1.77<br>1.60 | 0.68-1.13<br>0.86-1.37<br>1.27-2.46<br>0.86-2.98 | 8                                   | 1                    |
| Park et al. 2013, Korea (56)         | Representative sample of actively working population age 18-65<br>N=10,039 | -            | Face to face interviews, two questions        | Sleep problems   | One question yes/no                        | 5.1 %                                                 | Violence no/yes<br>threats no/yes                                                             | 1.98<br>1.96                 | 1.06-3.68<br>1.05-3.66                           | 7                                   | 2                    |
| Gluschkoff et al. 2017, Finland (55) | Primary and secondary school teachers<br>N=4988<br>Response rate 80 %      | Two years    | Self-administered questionnaire, one question | Sleep disruption | Jenkins sleep problems scale, four items   | n.a.                                                  | Two years after vs before event                                                               | 1,26                         | 1.07-1.48                                        | 8                                   | 0                    |

Table 7. Completeness of reporting and assessment of bias and confounding

| Study                                         | Completeness of reporting |                                |                       |               |                        |                       |               |                       |                 | Assessment of bias and confounding |                    |                                    |                                |             |                 |
|-----------------------------------------------|---------------------------|--------------------------------|-----------------------|---------------|------------------------|-----------------------|---------------|-----------------------|-----------------|------------------------------------|--------------------|------------------------------------|--------------------------------|-------------|-----------------|
|                                               | Study design              | Definition of study population | Recruitment procedure | Response rate | Exposure ascertainment | Outcome ascertainment | Data analyses | Statistical modelling | Sum score (0-8) | Selection bias                     | Common method bias | Non-differential misclassification | Selective reporting of results | Confounding | Sum score (0-5) |
| <b>Studies addressing psychiatric disease</b> |                           |                                |                       |               |                        |                       |               |                       |                 |                                    |                    |                                    |                                |             |                 |
| Wieclaw et al. 2006                           | +                         | +                              | +                     | +             | +                      | +                     | +             | +                     | 8               | 0                                  | 0                  | +                                  | 0                              | +           | 2               |
| Geiger-Brown et al. 2007                      | +                         | +                              | +                     | +             | +                      | +                     | 0             | 0                     | 8               | 0                                  | +                  | 0                                  | 0                              | +           | 2               |
| Madsen et al. 2011                            | +                         | +                              | +                     | +             | +                      | +                     | +             | +                     | 8               | +                                  | 0                  | 0                                  | 0                              | 0           | 1               |
| Dement et al. 2014                            | +                         | +                              | +                     | +             | +                      | +                     | +             | +                     | 8               | 0                                  | 0                  | +                                  | 0                              | 0           | 1               |
| <b>Studies addressing depressive symptoms</b> |                           |                                |                       |               |                        |                       |               |                       |                 |                                    |                    |                                    |                                |             |                 |
| Ryan et al. 2008                              | 0                         | +                              | 0                     | 0             | +                      | +                     | 0             | +                     | 4               | +                                  | +                  | 0                                  | 0                              | +           | 3               |
| Cavanaugh et al. 2014                         | +                         | +                              | 0                     | +             | +                      | +                     | 0             | 0                     | 5               | +                                  | +                  | 0                                  | 0                              | +           | 3               |
| Da Silva et al. 2015                          | +                         | +                              | +                     | +             | +                      | +                     | +             | +                     | 8               | 0                                  | +                  | 0                                  | 0                              | 0           | 1               |
| Jung et al. 2015                              | 0                         | +                              | +                     | 0             | +                      | +                     | +             | +                     | 6               | +                                  | +                  | 0                                  | 0                              | 0           | 2               |
| Butterworth et al. 2016                       | +                         | +                              | +                     | +             | +                      | +                     | +             | +                     | 8               | 0                                  | +                  | 0                                  | +                              | 0           | 2               |
| Fang et al. 2018                              | +                         | +                              | +                     | +             | +                      | +                     | 0             | +                     | 7               | 0                                  | +                  | 0                                  | 0                              | +           | 2               |
| Maran et al. 2018                             | 0                         | +                              | +                     | 0             | +                      | +                     | 0             | +                     | 5               | +                                  | +                  | 0                                  | 0                              | +           | 3               |
| The table continues next page                 |                           |                                |                       |               |                        |                       |               |                       |                 |                                    |                    |                                    |                                |             |                 |
| Study                                         | Completeness of reporting |                                |                       |               |                        |                       |               |                       |                 | Assessment of bias and confounding |                    |                                    |                                |             |                 |

|                                                                     | Study design | Definition of study population | Recruitment procedure | Response rate | Exposure ascertainment | Outcome ascertainment | Data analyses | Statistical modelling | Sum score (0-8) | Selection bias | Common method bias | Non-differential misclassification | Selective reporting of results | Confounding | Sum score (0-5) |
|---------------------------------------------------------------------|--------------|--------------------------------|-----------------------|---------------|------------------------|-----------------------|---------------|-----------------------|-----------------|----------------|--------------------|------------------------------------|--------------------------------|-------------|-----------------|
| <b>Studies addressing anxiety diagnosis</b>                         |              |                                |                       |               |                        |                       |               |                       |                 |                |                    |                                    |                                |             |                 |
| Madsen et al. 2011                                                  | +            | +                              | +                     | +             | +                      | +                     | +             | +                     | 8               | +              | 0                  | 0                                  | 0                              | 0           | 1               |
| <b>Studies addressing anxiety symptoms</b>                          |              |                                |                       |               |                        |                       |               |                       |                 |                |                    |                                    |                                |             |                 |
| Ryan et al. 2008                                                    | 0            | +                              | 0                     | 0             | +                      | +                     | 0             | +                     | 4               | +              | +                  | 0                                  | 0                              | +           | 3               |
| Gong et al. 2014                                                    | +            | +                              | +                     | +             | +                      | +                     | 0             | +                     | 7               | 0              | +                  | 0                                  | 0                              | +           | 2               |
| Butterworth et al. 2016                                             | +            | +                              | +                     | +             | +                      | +                     | +             | +                     | 8               | 0              | +                  | 0                                  | +                              | 0           | 2               |
| Maran et al. 2018                                                   | 0            | +                              | +                     | 0             | +                      | +                     | 0             | +                     | 5               | +              | +                  | 0                                  | 0                              | +           | 3               |
| <b>Studies addressing psychological distress</b>                    |              |                                |                       |               |                        |                       |               |                       |                 |                |                    |                                    |                                |             |                 |
| Leino et al. 2011                                                   | 0            | +                              | +                     | +             | +                      | +                     | +             | +                     | 7               | +              | +                  | 0                                  | 0                              | 0           | 2               |
| Magnavita N. 2012                                                   | +            | +                              | +                     | +             | 0                      | 0                     | 0             | +                     | 5               | 0              | +                  | 0                                  | +                              | +           | 3               |
| Jaradat et al. 2016                                                 | +            | +                              | 0                     | +             | +                      | +                     | +             | +                     | 7               | 0              | +                  | 0                                  | 0                              | +           | 2               |
| Zafar et al. 2016                                                   | +            | +                              | +                     | +             | +                      | +                     | 0             | +                     | 7               | 0              | +                  | 0                                  | 0                              | +           | 2               |
| <b>Studies addressing burnout, emotional exhaustion and fatigue</b> |              |                                |                       |               |                        |                       |               |                       |                 |                |                    |                                    |                                |             |                 |
| Hogh et al. 2003                                                    | +            | +                              | +                     | +             | +                      | +                     | +             | +                     | 8               | 0              | +                  | 0                                  | 0                              | 0           | 1               |
| Estryn-Behar et al. 2008                                            | +            | +                              | +                     | +             | +                      | 0                     | 0             | +                     | 5               | +              | +                  | 0                                  | 0                              | +           | 3               |
| Couto and Lawoko. 2011                                              | +            | +                              | +                     | +             | +                      | +                     | +             | +                     | 8               | 0              | +                  | 0                                  | 0                              | 0           | 1               |
| Zafar et al. 2016                                                   | +            | +                              | +                     | +             | +                      | +                     | 0             | +                     | 7               | 0              | +                  | 0                                  | 0                              | +           | 2               |
| Andersen et al. 2017                                                | +            | +                              | +                     | +             | +                      | +                     | 0             | +                     | 7               | +              | +                  | 0                                  | 0                              | +           | 3               |

|                                           |   |   |   |   |   |   |   |   |          |   |   |   |   |   |          |
|-------------------------------------------|---|---|---|---|---|---|---|---|----------|---|---|---|---|---|----------|
| Hamdan and Hamra. 2017                    | + | + | 0 | + | + | + | 0 | + | <b>6</b> | 0 | + | 0 | 0 | + | <b>2</b> |
| <b>Studies addressing disturbed sleep</b> |   |   |   |   |   |   |   |   |          |   |   |   |   |   |          |
| Eriksen et al. 2008                       | + | + | + | + | + | + | + | + | <b>8</b> | 0 | + | 0 | 0 | 0 | <b>1</b> |
| Park et al. 2013                          | + | + | + | 0 | + | + | + | + | <b>7</b> | + | + | 0 | 0 | 0 | <b>2</b> |
| Gluschkoff et al. 2017                    | + | + | + | + | + | + | + | + | <b>8</b> | 0 | 0 | 0 | 0 | 0 | <b>0</b> |

### Summary of overall results

The studies covered 15 countries, almost one third were from Scandinavia but all continents were represented. Sample sizes varied from small (< 300 workers) to very large in studies with national coverage in specific occupational groups, the median sample size being 6,867, and the total number of participants was around 165,000. Participation rates at baseline were above 80% in nine out of 24 studies and participation rates at follow-up were above 80% in three out of the ten cohort studies. The most frequent occupational groups studied were nurses and other health care professionals (14 studies). Risk estimates were mainly based upon comparisons of respondents reporting exposure to violence or threats of violence versus respondents reporting no such exposure.

### Exposure and outcome ascertainment

Information on exposure to workplace violence or threats of violence was retrieved by self-reports in questionnaires in 16 studies, interviews (six studies), a job exposure matrix (one study) (2) and records of compensation claims (one study) (39). Questions were most often one- or two-item questions such as “Have you been exposed to physical violence at your workplace during the last 12 months?” without further specification.

However, two studies specified a list of 13-18 items of different forms of violent incidents and threats(40, 41), and eight studies applied multi-item scales developed in earlier research such as the Violent Incidence Form (VIF) (33, 42, 43), The Experience of Assault Questionnaire (34) or the Workplace Violence in the Health Sector Country Case Studies Research Instruments (35, 44-46). The majority of the studies had the most recent 12 months time period as exposure window but three studies asked about the previous six months(34, 48, 51) and in two studies the time frame was not clearly defined in the questionnaire(54, 57). Data on frequency of exposure the preceding 12 months were obtained in some studies while measures of severity and temporality were scarce. The prevalence of reported exposure varied substantially across studies – from 2.3%(46) to 63.4%(34) for violence and from 0.8%(56) to 75%(43) for threats of violence.

Outcome ascertainment was based upon questionnaire replies (15 studies) or telephone/face-to-face interview (six studies) using different versions of symptom scales such as CES-D (Center for Epidemiologic Studies Depression Scale), BDI (Beck Depression Inventory), GHQ (general health questionnaire), SCL (symptom check list) and the SF-36 vitality scale. Two studies used prescription of anti-depressive pharmaceuticals and one study hospital records to identify cases with depressive disorder (2, 39, 47). Outcome occurrence varied substantially – for instance the prevalence of depressive disorders and depressive symptoms spanned from 4% (47) to 57%(45).
